# Supplementary material for: The Use of Flavylium Salts as Dynamic Inhibitor Moieties for Human Cb5R
Source: MDPI journal article supplement (doi:10.3390/molecules28010123), 2022-12-23
Supplement: s1 [file s1]

## Supplementary Information

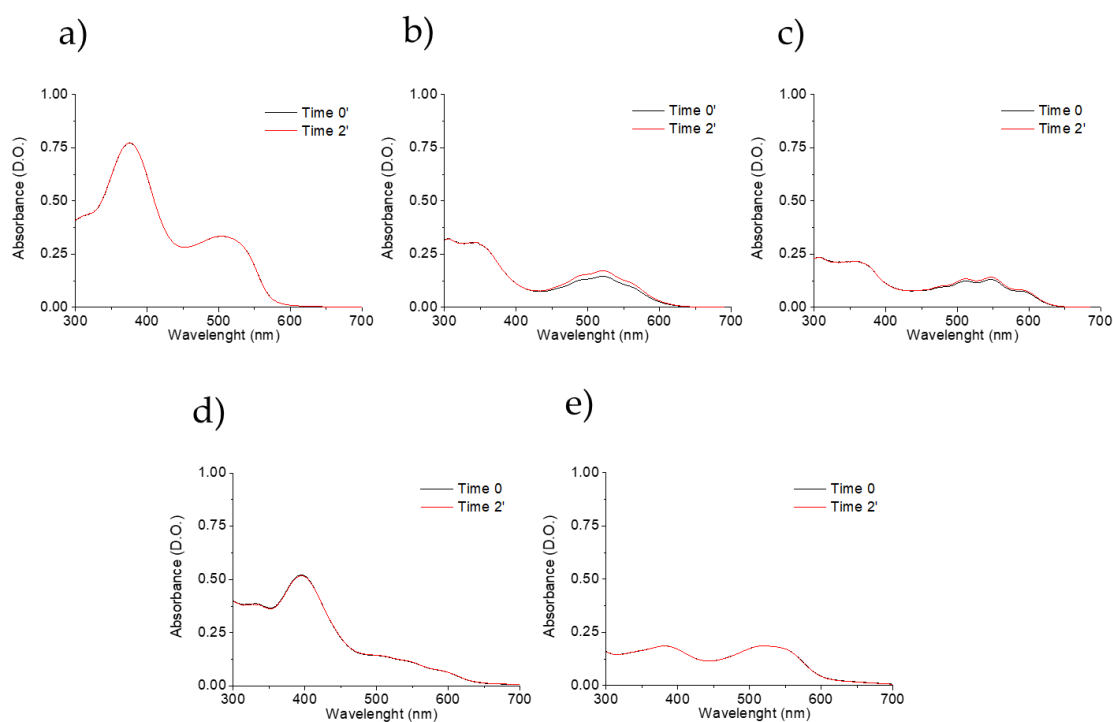

- Figure S1. Absorbance spectra of the flavylium salts (50  $\mu\text{M}$ ) were immediately measured after addition to potassium phosphate buffer 20mM, EDTA 1mM, pH 7.0, and after incubation for 2 minutes in these conditions. The absorbance spectra of compounds 1, 2, 3, 4, 5 measured in phosphate buffer, EDTA 1mM pH 7.0 are shown in panel a, b, c, d, e, respectively, after addition to the buffer (black line) and after 2 minutes incubation (red line).

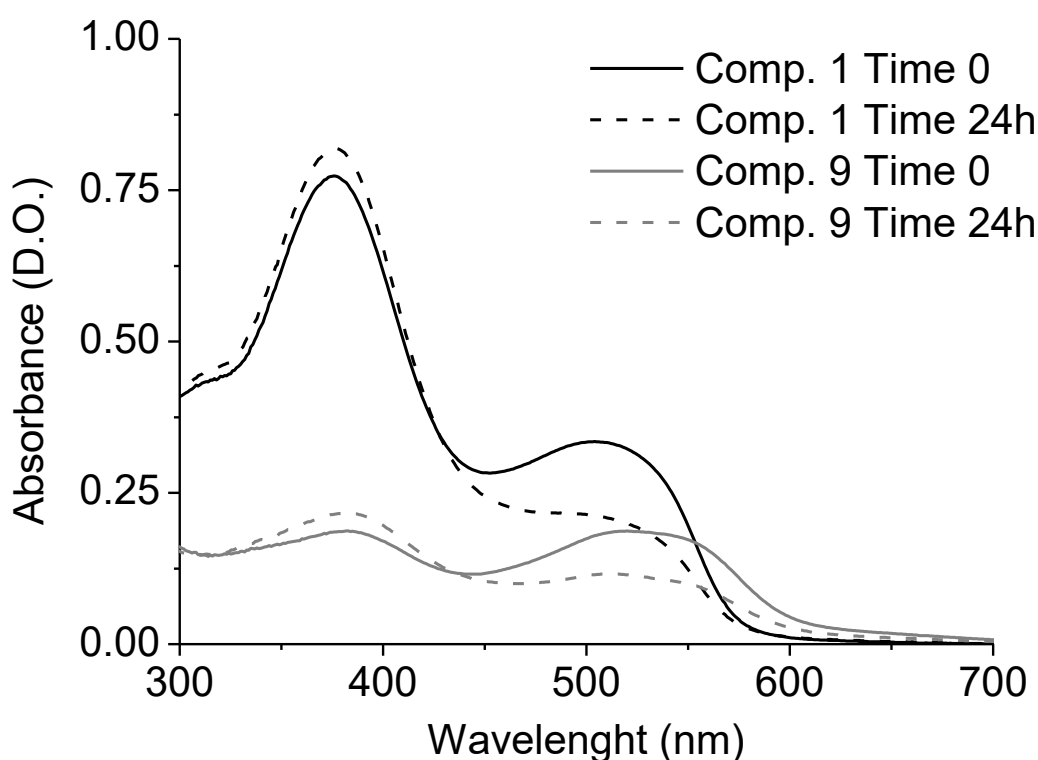

- Figure S2. The UV-vis spectra of the non-equilibrated form of compounds 1 and 5 were obtained after instant measurement of the spectra of the acidified solution of each compound (DMSO+ 0.1M HCl) upon addition to 100mM of potassium phosphate pH 7.0 (non-equilibrated conditions) or by incubation in this buffer for 24h (equilibrated conditions), confirmed that the composition of the tested aliquots was correct (Panel c).

|        |     |             |             |            |             |     |
|--------|-----|-------------|-------------|------------|-------------|-----|
| Q6BCY4 | 1   | MNSRRREPIT  | LQDPEAKYPL  | PLIEKEKISH | NTRRRFRGLP  | 40  |
| 1I7P   | 27  | . . MHHHMIT | LENPDIKYPL  | RLIDKEILSH | DTRRRFRFALP | 64  |
| Q6BCY4 | 41  | SPDHVLGLPV  | GNVYQLLAKI  | DNELVVRAYT | PVSSDDDRGF  | 80  |
| 1I7P   | 65  | SPQHILGLPI  | GQHIYLISTRI | DGNLVIRPYT | PVSSDDDKGF  | 104 |
| Q6BCY4 | 81  | VDLI IKIYFK | NVHPQYPEGG  | KMTQYLENMK | IGETIFFRGP  | 120 |
| 1I7P   | 105 | VDLVVKVYFK  | ETHPKFPAGG  | KMSQYLENMN | IGDTIEFRGP  | 144 |
| Q6BCY4 | 121 | RGRLFYHGPG  | NLGIRPDQTS  | EPKKTADHL  | GMIAGGTGIT  | 160 |
| 1I7P   | 145 | NGLLVYQGKG  | KFAIRADKKS  | NPVVRTVKSV | GMIAGGTGIT  | 184 |
| Q6BCY4 | 161 | PMLQLIRHIT  | KDPSDRTRMS  | LIFANQTEED | ILVRKELEEI  | 200 |
| 1I7P   | 185 | PMLQVIRAVL  | KDPNDHTVCY  | LLFANQSEKD | ILLRPELEEL  | 224 |
| Q6BCY4 | 201 | ARTHPDQFNL  | WYTLDRPPIG  | WKYSSGFVTA | DMIKEHLPPP  | 240 |
| 1I7P   | 225 | RNEHSSRFKL  | WYTVDKAPDA  | WDYSQGFVNE | EMIRDHLPPP  | 264 |
| Q6BCY4 | 241 | AKSTLILVCG  | PPPLIQTAAH  | PNLEKLGYTQ | DMIFTY      | 276 |
| 1I7P   | 265 | GEETLILMCG  | PPPMIQFACL  | PNLERVGHPK | ERCFTF      | 300 |

- Figure S3. Alignment of the rat Cb5R sequence of the PDB used in this study (PDB file:1I7P) and the sequence of human soluble Cb5R (Unitpro code: Q6BCY4). Cb5R's residues that were found common for the interaction with inhibitors are labeled in orange. As shown in the alignment, those residues are the same in the sequence of human Cb5R.

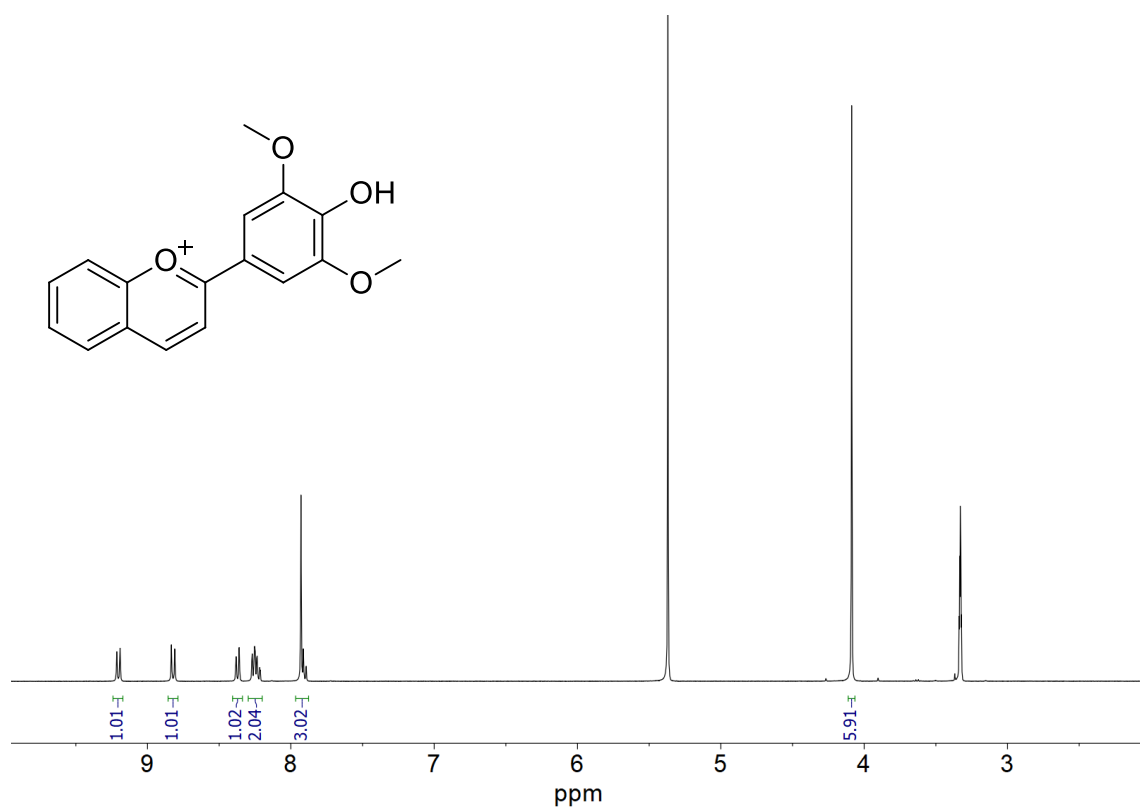

**Figure S4.** <sup>1</sup>H NMR spectrum (400 MHz) of compound **3** in 99:1 (v:v) CD<sub>3</sub>OD:DCl 20% in D<sub>2</sub>O.

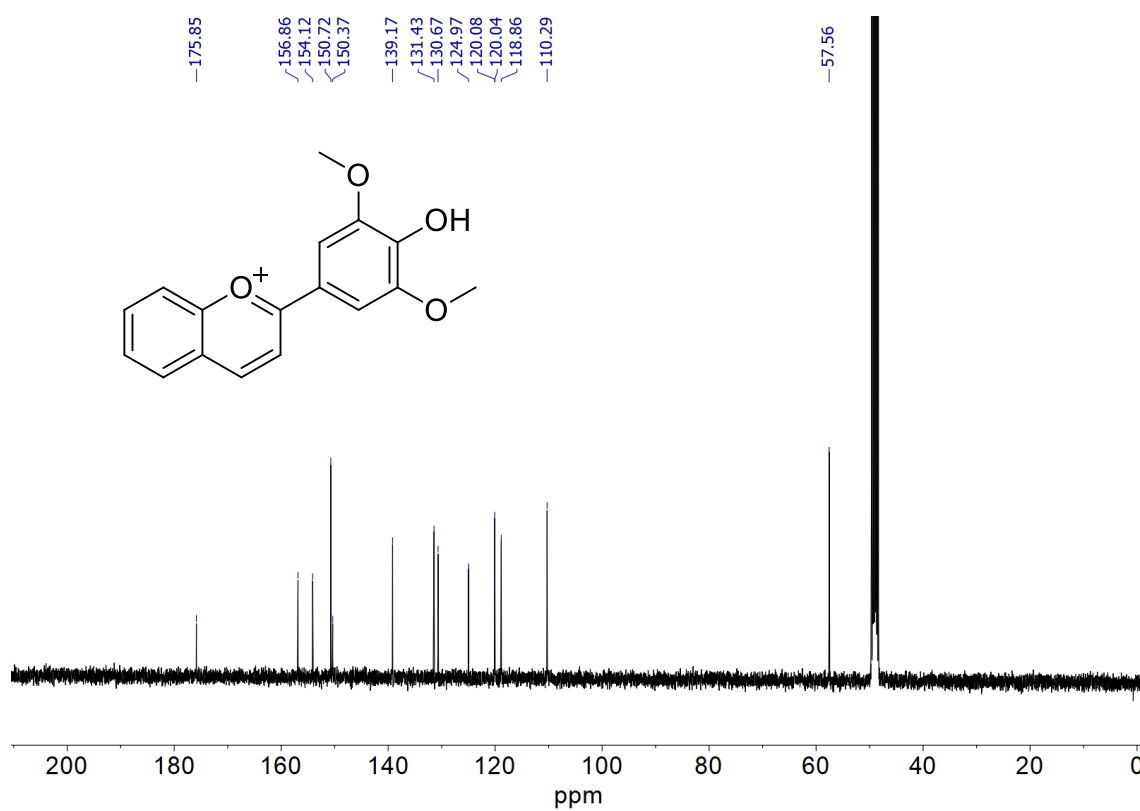

**Figure S5.** <sup>13</sup>C{<sup>1</sup>H} NMR spectrum (101 MHz) of compound **3** in 99:1 (v:v) CD<sub>3</sub>OD:DCl 20% in D<sub>2</sub>O.

Nunoc\_221016115028 #99 RT: 4.28 AV: 1 NL: 3.88E5  
T: FTMS + p ESI Full ms [50.00-500.00]

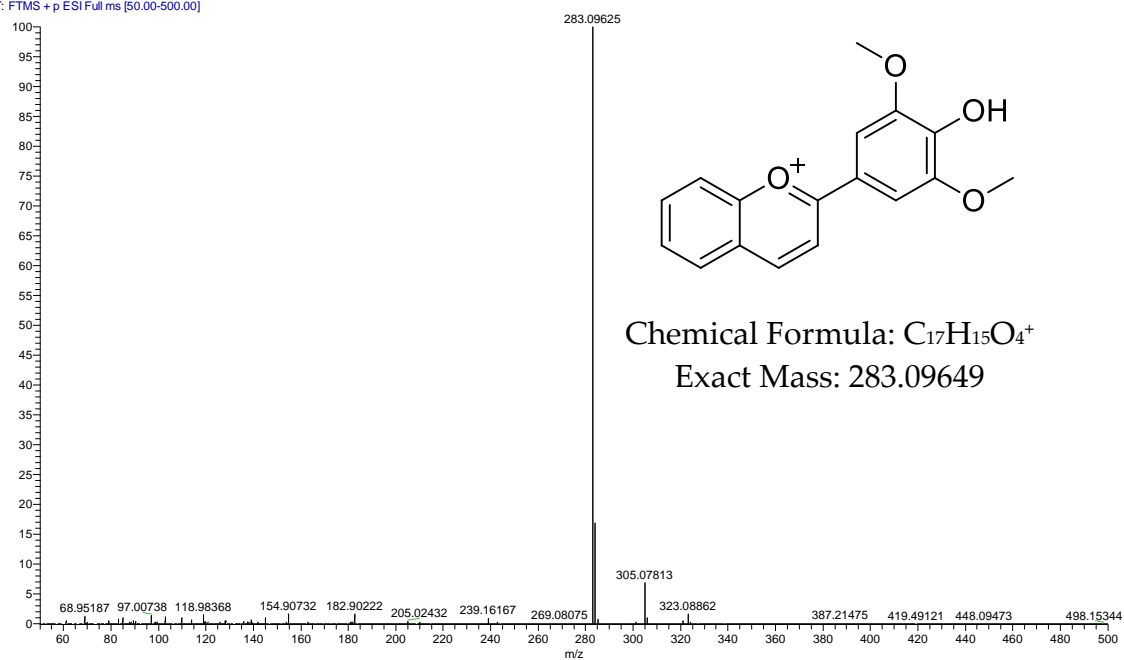

**Figure S6.** HRMS spectrum of compound **3**.
